# Supplementary material for: Aerosol chemistry, transport, and climatic implications during extreme biomass burning emissions over the Indo-Gangetic Plain
Source: Copernicus journal article supplement (doi:10.5194/acp-18-14197-2018), 2018-10-08
Supplement: Supplementary file 1 [file acp-18-14197-2018-supplement.pdf]

Supplement of Atmos. Chem. Phys., 18, 14197–14215, 2018  
<https://doi.org/10.5194/acp-18-14197-2018-supplement>  
© Author(s) 2018. This work is distributed under  
the Creative Commons Attribution 4.0 License.

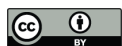

*Supplement of*

## **Aerosol chemistry, transport, and climatic implications during extreme biomass burning emissions over the Indo-Gangetic Plain**

**Nandita Singh et al.**

*Correspondence to:* Tirthankar Banerjee ([tirthankaronline@gmail.com](mailto:tirthankaronline@gmail.com), [tb.iesd@bhu.ac.in](mailto:tb.iesd@bhu.ac.in))

The copyright of individual parts of the supplement might differ from the CC BY 4.0 License.

**Aerosol chemistry, transport and climatic implications during extreme biomass burning emissions over Indo-Gangetic Plain**

---

**Supplementary File**

Table S1. Descriptive statistics of PM, BC mass concentration and meteorological parameters during entire monitoring period.

|              | PM <sub>&lt;1.1</sub><br>( $\mu\text{gm}^{-3}$ ) | PM <sub>1.1-2.1</sub><br>( $\mu\text{gm}^{-3}$ ) | PM <sub>&gt;2.1</sub><br>( $\mu\text{gm}^{-3}$ ) | BC<br>( $\text{ngm}^{-3}$ ) | ABL<br>(m) | Humidity<br>(%) | Temperature<br>( $^{\circ}\text{C}$ ) |
|--------------|--------------------------------------------------|--------------------------------------------------|--------------------------------------------------|-----------------------------|------------|-----------------|---------------------------------------|
| Minimum      | 14                                               | 9                                                | 111                                              | 2036                        | 226        | 54              | 11                                    |
| Maximum      | 274                                              | 129                                              | 528                                              | 15457                       | 585        | 99              | 31                                    |
| 1st Quartile | 56                                               | 19                                               | 167                                              | 6332                        | 343        | 65              | 20                                    |
| Median       | 96                                               | 33                                               | 218                                              | 8259                        | 397        | 71              | 23                                    |
| 3rd Quartile | 185                                              | 56                                               | 253                                              | 10102                       | 467        | 82              | 26                                    |
| Mean         | 118                                              | 44                                               | 228                                              | 8318                        | 402        | 74              | 23                                    |
| Std. Dev.    | 88                                               | 36                                               | 112                                              | 2985                        | 81         | 12              | 5                                     |
| Variance     | 7666                                             | 1332                                             | 12504                                            | 8911767                     | 6624       | 140             | 22                                    |
| Geo. mean    | 83                                               | 32                                               | 210                                              | 7731                        | 393        | 73              | 22                                    |
